# Supplementary material
Source: PubMed Central journal article supplement (PMC9810471)

Figure S1

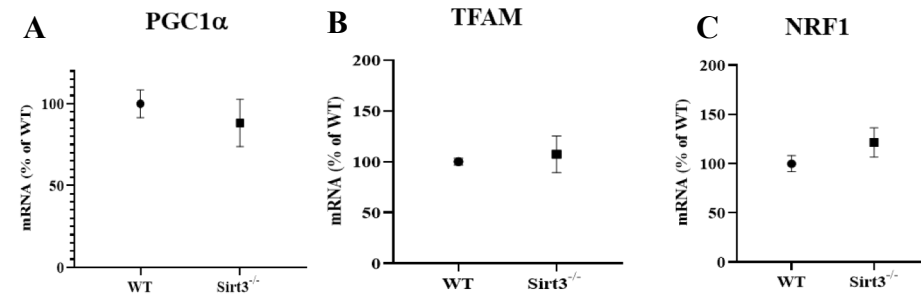

Figure S2

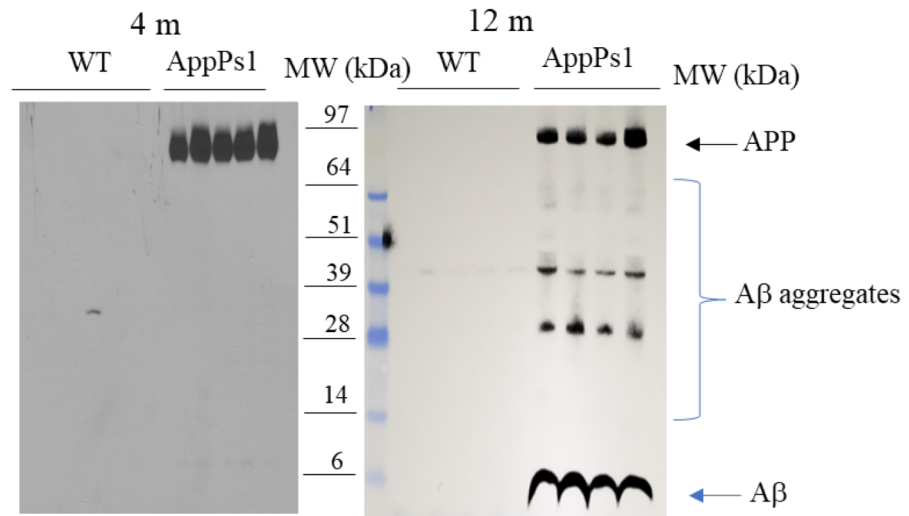

Supplement: NIHMS1861472-supplement-supp_1.pdf [file NIHMS1861472-supplement-supp_1.pdf]
